# Supplementary material
Source: publisher figshare collection journal article supplement (https://gsajournals.figshare.com/articles/dataset/_/14899278)

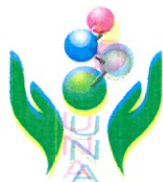

UNIVERSITE  
NANGUI ABROGOUA

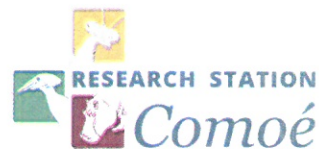

Abidjan le **12 DEC 2018**

N° **189**/UNA/CRE/SREC

## LETTRE DE COUVERTURE

Je soussigné Docteur KONE N'golo Abdoulaye, Directeur de la Station de Recherche Ivoir-Allemande du Parc national de la Comoé (PNC) en Côte d'Ivoire, atteste que le **Professeur Michael THOMAS-POULSEN** de nationalité Danoise et son équipe (collègues et étudiants), ont en leur possession des échantillons de espèces termites champignoniste et les nodules ou mycotêtes de leurs champignons symbiotiques respectifs, qu'ils acheminent vers le Laboratoire de Biologie (Section écologie et évolution) de l'Université de Copenhagen (Danemark) pour des études moléculaires et phylogénétiques.

L'expédition de ce matériel biologique au Danemark s'inscrit dans le cadre de la coopération de recherche scientifique entre les Universités Nangui Abrogoua (Côte d'Ivoire) et celle de Copenhagen (Danemark).

**Ces échantillons n'ont aucune valeur commerciale, ne figurent pas sur la liste de la convention sur le commerce international des espèces de faune et de flore sauvages menacées d'extinction (CITES). Ils ne sont également pas dangereux et ne serviront qu'à un usage purement scientifique.**

En foi de quoi, cette lettre de couverture leur est délivrée pour servir et valoir ce que de droit.

PJ: Détails des échantillons

Station de Recherche en Ecologie  
PN Comoé  
Côte d'Ivoire  
Le Directeur  
  
Dr. KONE N'golo Abdoulaye

## DETAILS DES ECHANTILLONS

- Ouvriers de termites champignonnistes en élevage dans du sol;
- Cultures pures d'espèces de champignons du genre *Termitomyces*;
- Intestins de termites conservés dans des tubes contenant une solution salée;
- Espèces de termites conservés dans des tubes contenant une solution salée;
- Débris végétaux collectés dans les zones de fourragement des termites récoltés;
- Spécimens séchés de l'espèce de champignon *Podaxis* sp.;
- Meules à champignons séchés;
- Specimens séchés de *Pseudoxylaria* sp.;
- Quelques spécimens de mouches Tsé Tsé.

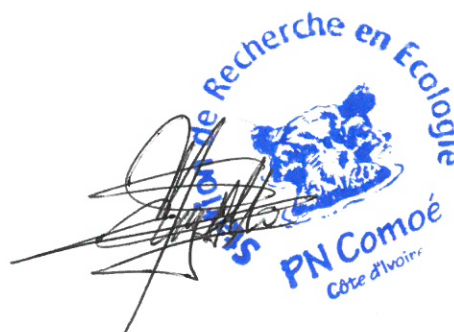

Supplement: Supplementary file 1 [file 1]
